# Supplementary material
Source: PubMed Central journal article supplement (PMC3044388)
Supplement: 1017707108_pnas.201017707SI.pdf [file 1017707108_pnas.201017707SI.pdf]

# Supporting Information

Fang et al. 10.1073/pnas.1017707108

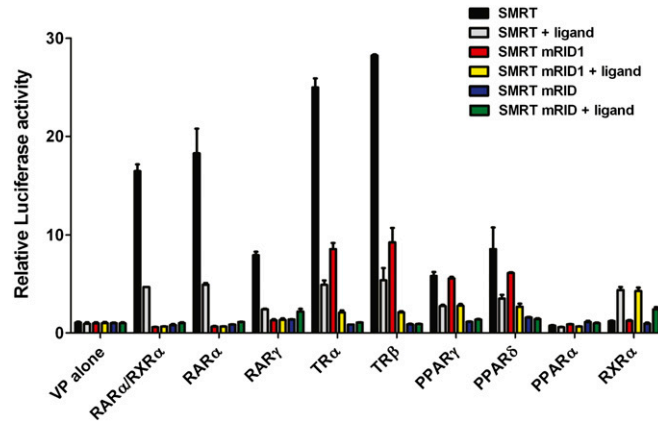

Fig. S1. SMRT<sup>mRID1</sup> domain-specific interaction with NRs. Mammalian two-hybrid experiments were performed to determine the interaction between WT, SMRT<sup>mRID1</sup>, and SMRT<sup>mRID</sup> GAL4-SMRT and indicated VP-16-NR-LBD fusion proteins in CV-1 cells.

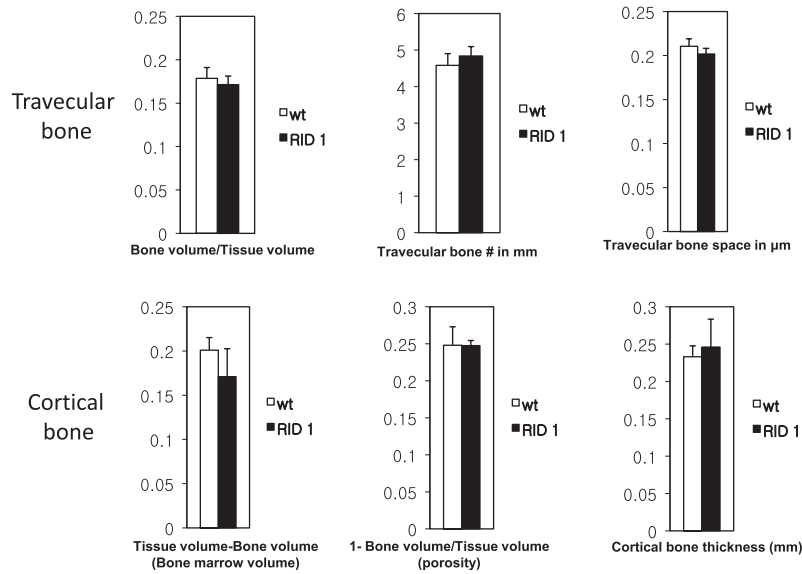

Fig. S2. Analyses of bone structure in WT and SMRT<sup>mRID1</sup> mice. Traveicular and cortical bones in WT and SMRT<sup>mRID1</sup> were subjected to Micro CT scan.

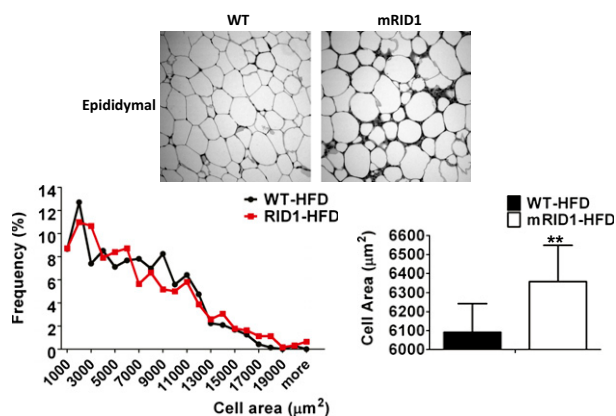

**Fig. S3.** Analyses of epididymal fat depots in WT and SMRT<sup>mRID1</sup> mice. Epididymal fat depot was subject to analysis of adipocyte cross-sectional area in WT and SMRT<sup>mRID1</sup> mice. All error bars are SE. \*\*P < 0.01.

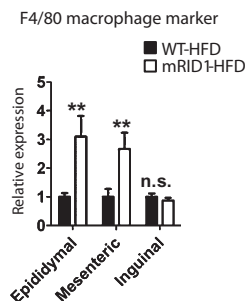

**Fig. S4.** Gene expression of macrophage-specific markers in various white adipose tissue (WAT) depots. Macrophage-specific marker F4/80 expression was examined by quantitative real-time PCR. All error bars are SD. \*\*P < 0.01.

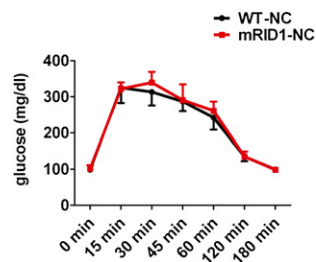

**Fig. S5.** Glucose tolerance test (GTT) in normal chow-fed WT and SMRT<sup>mRID1</sup>. Age-matched WT and SMRT<sup>mRID1</sup> mice were subjected to GTT under normal chow diet.

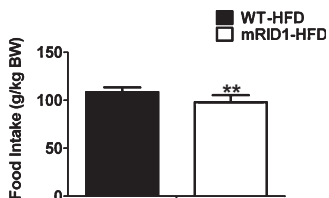

**Fig. S6.** Comparison of food intake WT and SMRT<sup>mRID1</sup>. Food intake was normalized by body weight in WT and SMRT<sup>mRID1</sup> mice on a high-fat diet (HFD). All error bars are SD. \*\*P < 0.01.

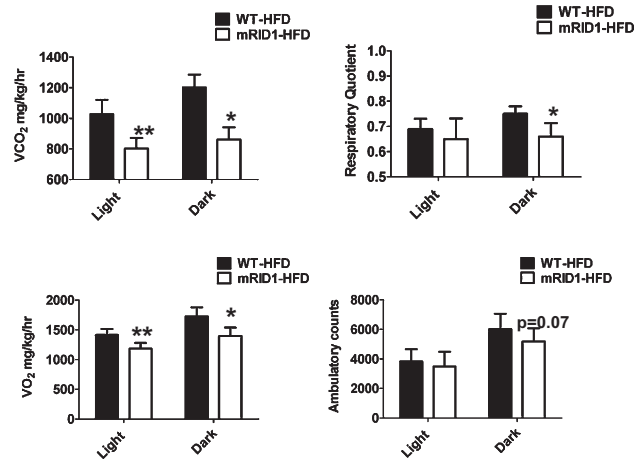

**Fig. S7.** Comparison of metabolic rates in body-weight-matched WT and SMRT<sup>mRID1</sup> mice on a high-fat diet (HFD). Carbon dioxide production (VCO<sub>2</sub>), oxygen consumption (VO<sub>2</sub>), respiratory quotient, and ambulatory counts were measured in body-weight-matched WT and SMRT<sup>mRID1</sup> mice on a HFD. All error bars are SD. \* $P < 0.05$ , \*\* $P < 0.01$ .

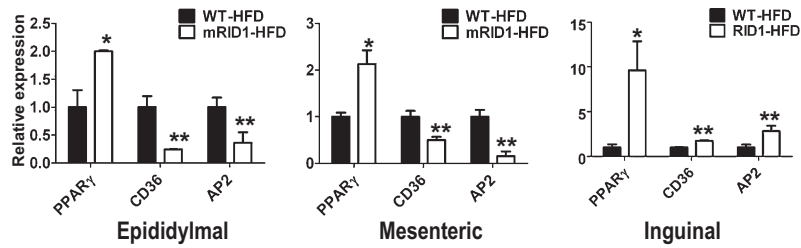

**Fig. S8.** Comparison of expression levels of PPAR<sub>γ</sub> target genes in different WAT depots of WT and SMRT<sup>mRID1</sup> mice. Well-known PPAR<sub>γ</sub> target genes, such as AP2 and CD36, were subjected to RT-quantitative PCR to determine their expression levels in different white adipose tissue (WAT) depots of WT and SMRT<sup>mRID1</sup> mice. All error bars are SD. \* $P < 0.05$ , \*\* $P < 0.01$ .
